# Supplementary material
Source: publisher figshare collection journal article supplement (https://gsapubs.figshare.com/ndownloader/files/23320460)
Supplement: Supplementary file 1 [file 23320460]

Supplemental File 1 - Interactive videogame visualization presenting a 'virtual field trip' introducing basic geology concepts using a UAV-SfM textured mesh model within Dinosaur Provincial Park (Alberta, Canada). Standalone application (.exe file) for machines running Windows (no software required). Note the README.txt file after Unzipping prior to running.

Supplemental File 2 - Interactive videogame visualization presenting a 'virtual field trip' introducing basic geology concepts using a UAV-SfM textured mesh model within Dinosaur Provincial Park (Alberta, Canada). Standalone application (.app file) for machines running macOS (no software required). Note the README.txt file after Unzipping prior to running.
